# Supplementary material for: Cholinergic Modulation Promotes Attentional Modulation in Primary Visual Cortex- A Modeling Study
Source: PubMed Central journal article supplement (PMC6934489; doi:10.1038/s41598-019-56608-3), 2019-12-27

# Supplementary Information: Cholinergic Modulation Promotes Attentional Modulation in Primary Visual Cortex- A Modeling Study

Atena Sajedin, Mohammad Bagher Menhaj, Abdol-Hossein Vahabie,  
Stefano Panzeri, and Hossein Esteky

## Supplementary Figures

**Figure S1.** Effects of varying the slow potassium conductance upon percentage of power in the gamma-frequency band of the STA LFP. For each value of potassium conductance, we plot the percentage of power in the gamma frequency band. The error bars indicate the 95% confidence intervals.

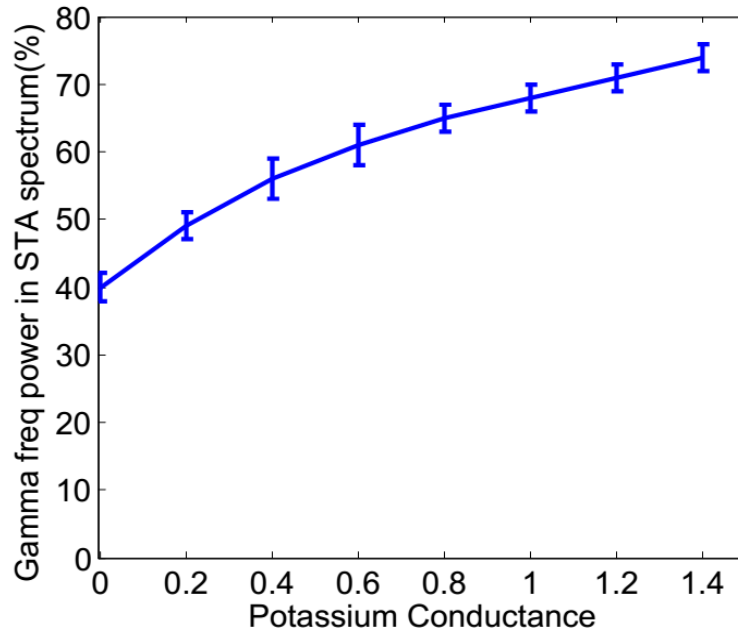

**Figure S2.** Effect of different levels of ACh application on the tuning curves of the individual neurons, with different levels of baseline activity of the network. (A) Applying High level, (B) low level of ACh, and control condition (C) in different baseline activity strongly alters orientation selectivity of V1 neurons.

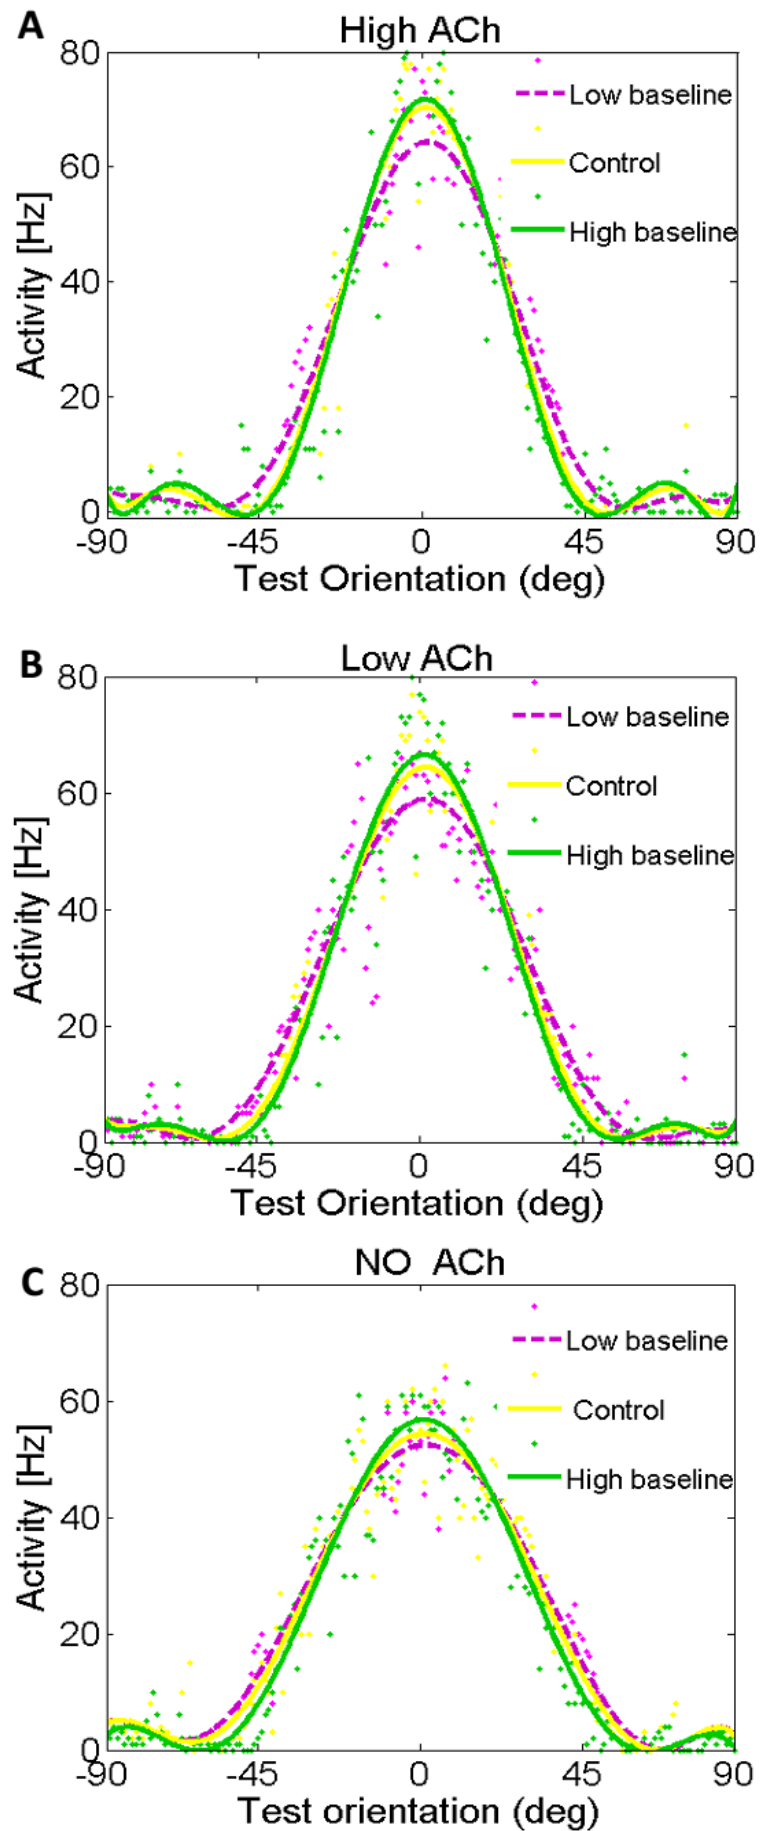

Supplement: 41598_2019_56608_MOESM1_ESM.pdf [file 41598_2019_56608_MOESM1_ESM.pdf]
